# Supplementary material
Source: MDPI journal article supplement (https://www.mdpi.com/2073-4344/13/5/908)

## Supporting Information

# Synthesis, and Anticancer Evaluation of 4-[(Indol-3-yl)-arylmethyl]-1-phenyl-3-methyl-5-pyrazolone Derivatives via a Magnetic Aminated Starch Biocatalyst

Ali Ramshini<sup>1</sup>, Shefa Mirani Nezhad<sup>1</sup>, Seied Ali Pourmousavi<sup>1\*</sup>, Ehsan Nazarzadeh Zare<sup>1\*</sup>, Mona Pourjafar<sup>2</sup>, Esmaeel Sharifi<sup>3,4</sup>

1 School of Chemistry, Damghan University, Damghan 3671645667, Iran;  
ramshiniali8@gmail.com (A.R.); shefamirani@yahoo.com (S.M.N.)

2 Research Center for Molecular Medicine, Hamadan University of Medical Sciences, Hamadan 6517838636, Iran; pourjafar\_mona@yahoo.com

3 Cancer Research Center, Hamadan University of Medical Sciences, Hamadan 6517838636, Iran; esmaeel.sharifi@gmail.com

4 Department of Tissue Engineering and Biomaterials, School of Advanced Medical Sciences and Technologies, Hamadan University of Medical Sciences, Hamadan 6517838636, Iran

\* Correspondence: pourmousavi@du.ac.ir (S.A.P.); ehsan.nazarzadehzare@gmail.com or e.nazarzadeh@du.ac.ir (E.N.Z.)

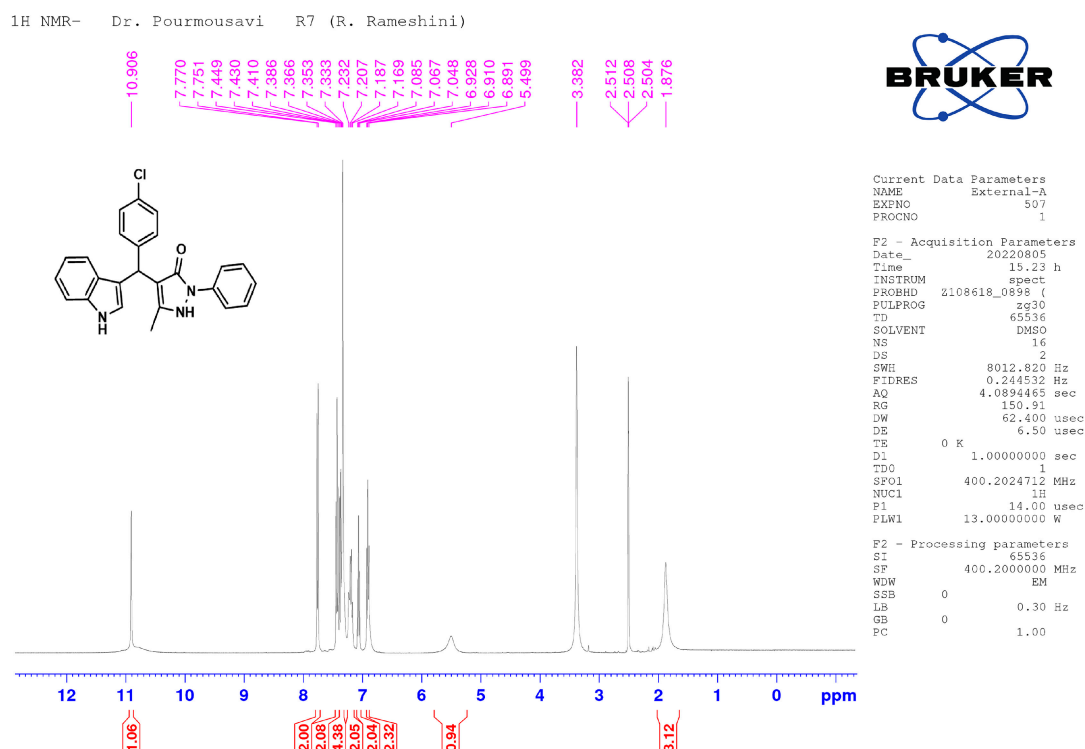

Figure S1: <sup>1</sup>H-NMR spectrum of 4-((4-chlorophenyl)(1H-indol-3-yl)methyl)-5-methyl-2-phenyl-1,2-dihydro-3H-pyrazol-3-one (6b)

<sup>13</sup>C NMR- Dr. Pourmousavi R 7 (A. Ramshini)

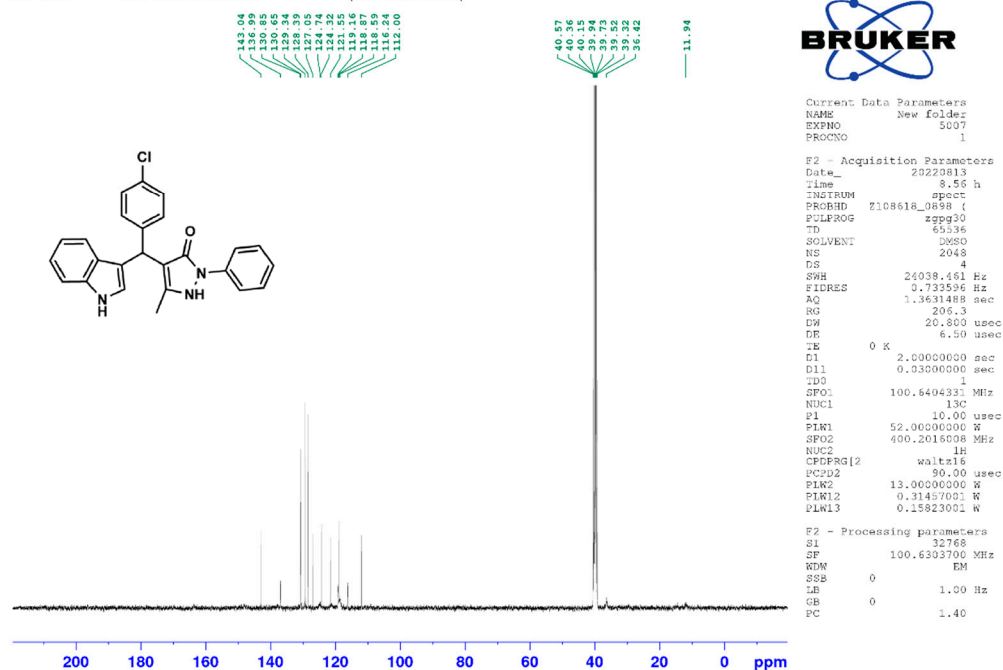

**Figure S2:** <sup>13</sup>C-NMR spectrum of 4-((4-chlorophenyl)(1H-indol-3-yl)methyl)-5-methyl-2-phenyl-1,2-dihydro-3H-pyrazol-3-one(6b)

<sup>1</sup>H NMR- Dr. Pourmousavi R20 (R. Rameshini)

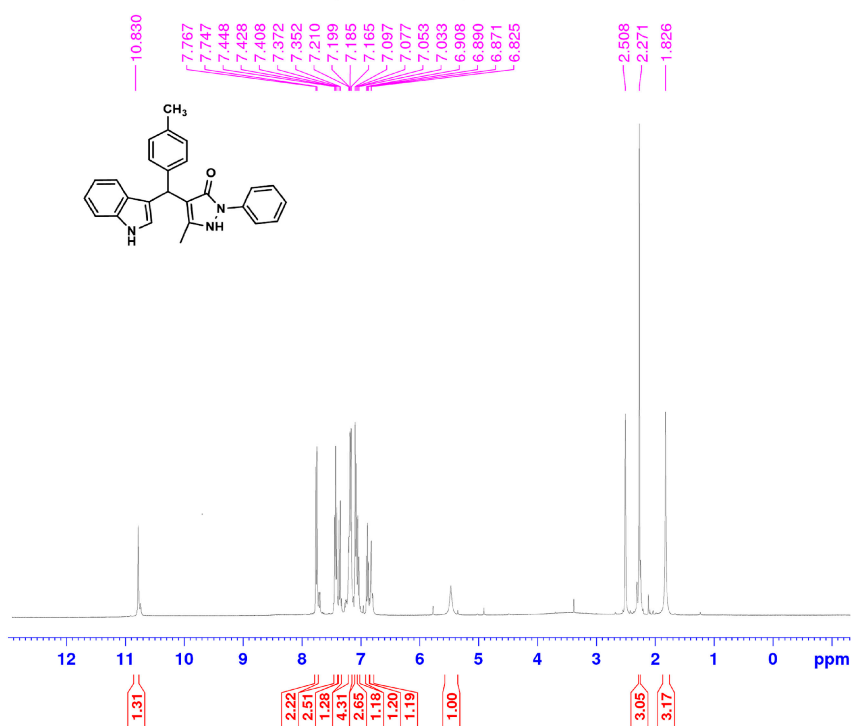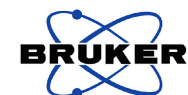

Current Data Parameters  
NAME External-A  
EXPNO 520  
PROCNO 1

F2 - Acquisition Parameters  
Date\_ 20220805  
Time 16.35 h  
INSTRUM spect  
PROBHD Z108618\_0898 ( )  
PULPROG zg30  
TD 65536  
SOLVENT DMSO  
NS 32  
DS 2  
SWH 8012.820 Hz  
FIDRES 0.244532 Hz  
AQ 4.0894465 sec  
RG 166.21  
DW 62.400 usec  
DE 6.50 usec  
TE 0 K  
D1 1.00000000 sec  
TDO 1  
SFO1 400.2024712 MHz  
NUC1 1H  
P1 14.00 usec  
PLW1 13.00000000 W

F2 - Processing parameters  
SI 65536  
SF 400.2000000 MHz  
WDW EM  
SSB 0  
LB 0.30 Hz  
GB 0  
PC 1.00

<sup>1</sup>H NMR- Dr. Pourmousavi R20 (R. Rameshini)

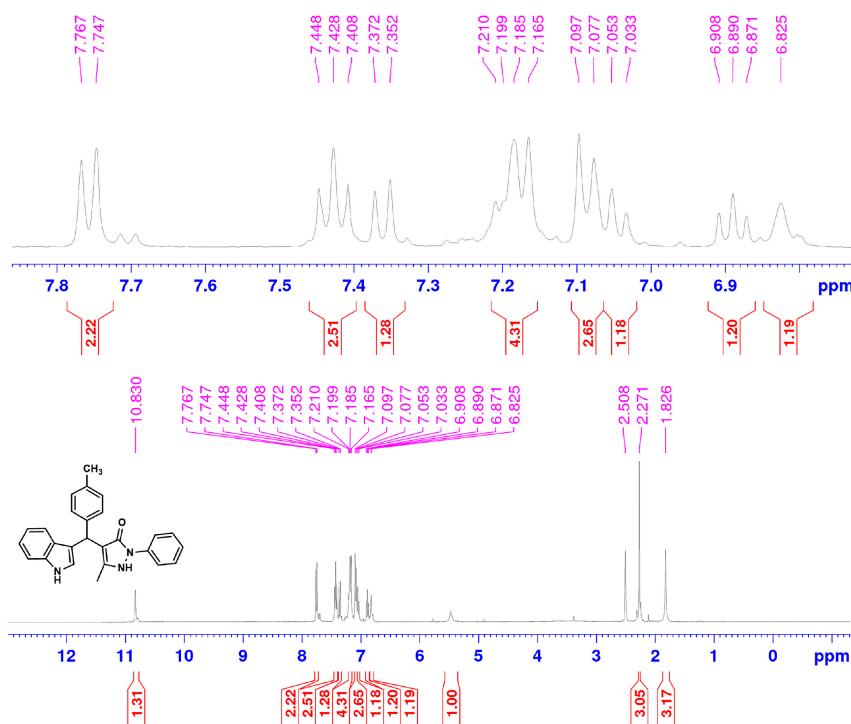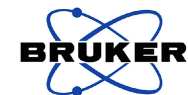

Current Data Parameters  
NAME External-A  
EXPNO 520  
PROCNO 1

F2 - Acquisition Parameters  
Date\_ 20220805  
Time 16.35 h  
INSTRUM spect  
PROBHD Z108618\_0898 ( )  
PULPROG zg30  
TD 65536  
SOLVENT DMSO  
NS 32  
DS 2  
SWH 8012.820 Hz  
FIDRES 0.244532 Hz  
AQ 4.0894465 sec  
RG 166.21  
DW 62.400 usec  
DE 6.50 usec  
TE 0 K  
D1 1.00000000 sec  
TDO 1  
SFO1 400.2024712 MHz  
NUC1 1H  
P1 14.00 usec  
PLW1 13.00000000 W

F2 - Processing parameters  
SI 65536  
SF 400.2000000 MHz  
WDW EM  
SSB 0  
LB 0.30 Hz  
GB 0  
PC 1.00

Figure S3: <sup>1</sup>H-NMR spectrum of 4-((1H-indol-3-yl)(p-tolyl)methyl)-5-methyl-2-phenyl-1,2-dihydro-3H-pyrazol-3-one (6c)

<sup>13</sup>C NMR- Dr. Pourmousavi R20 (A. Ramshini)

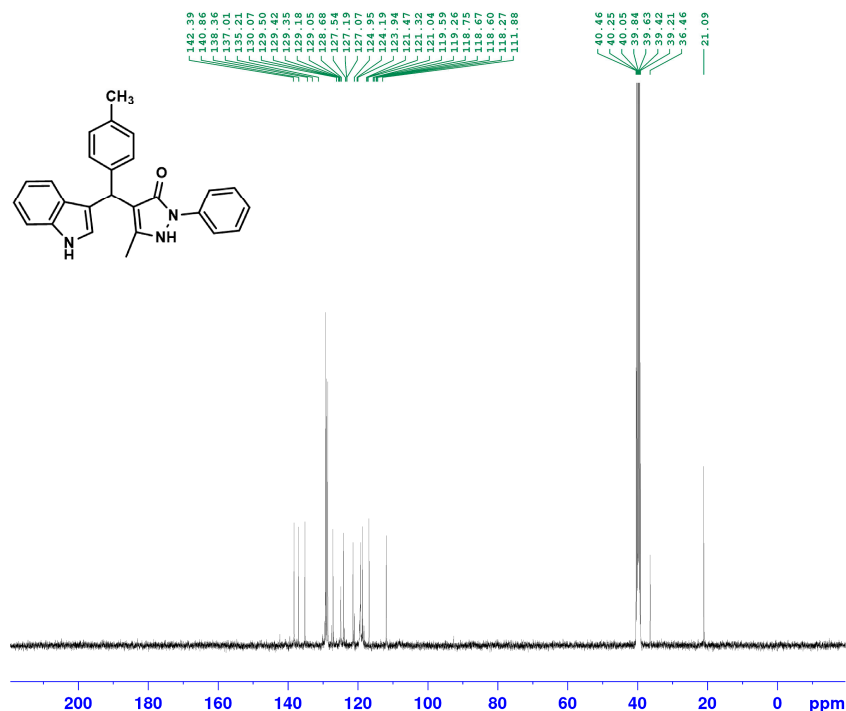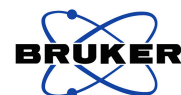

Current Data Parameters  
NAME New folder  
EXPNO 9020  
PROCNO 1

F2 - Acquisition Parameters  
Date\_ 20220907  
Time 10:36 h  
INSTRUM spect  
PROBHD Z108618\_0898 ( )  
PULPROG zgpg30  
TD 65536  
SOLVENT DMSO  
NS 1100  
DS 4  
SWH 24038.461 Hz  
FIDRES 0.733596 Hz  
AQ 1.3631488 sec  
RG 206.3  
DW 20.800 usec  
DE 6.50 usec  
TE 0 K  
D1 2.00000000 sec  
D11 0.03000000 sec  
TD0 1  
SFO1 100.6404331 MHz  
NUC1 13C  
P1 10.00 usec  
PLW1 52.00000000 W  
SFO2 400.2016008 MHz  
NUC2 1H  
CPDPRG2 waltz16  
PCPD2 90.00 usec  
PLW2 13.00000000 W  
PLW12 0.31457001 W  
PLW13 0.15823001 W

F2 - Processing parameters  
SI 32768  
SF 100.6303700 MHz  
WDW EM  
SSB 0  
LB 1.00 Hz  
GB 0  
PC 1.40

Figure S4: <sup>13</sup>C-NMR spectrum of 4-((1H-indol-3-yl)(p-tolyl)methyl)-5-methyl-2-phenyl-1,2-dihydro-3H-pyrazol-3-one (6c)

<sup>1</sup>H NMR- Dr. Pourmousavi R14 (R. Rameshini)

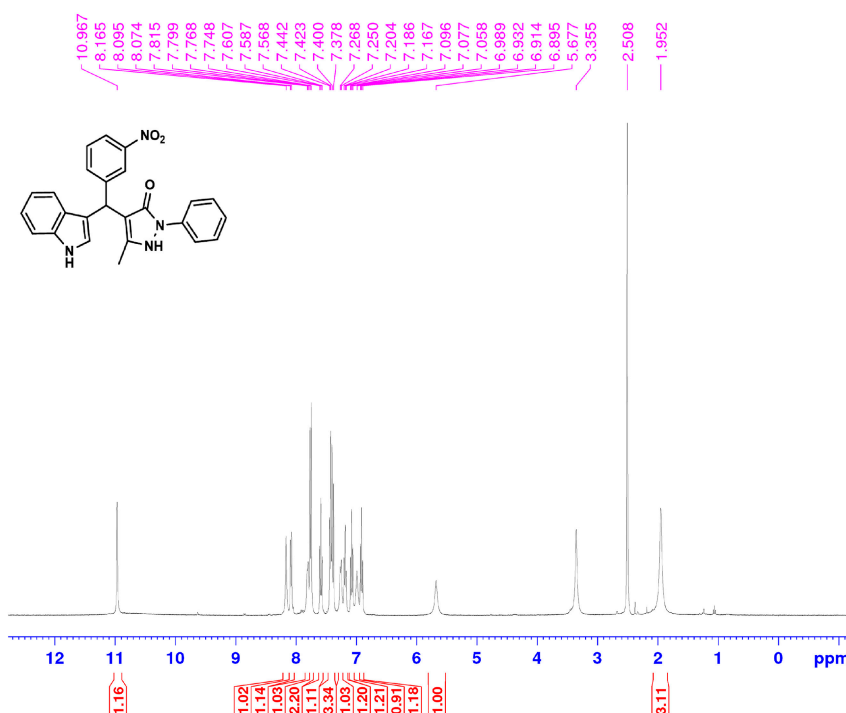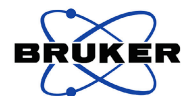

Current Data Parameters  
NAME External-A  
EXPNO 514  
PROCNO 1

F2 - Acquisition Parameters  
Date\_ 20220805  
Time 15:57 h  
INSTRUM spect  
PROBHD Z108618\_0898 ( )  
PULPROG zg30  
TD 65536  
SOLVENT DMSO  
NS 16  
DS 2  
SWH 8012.820 Hz  
FIDRES 0.244532 Hz  
AQ 4.0894463 sec  
RG 206.3  
DW 62.400 usec  
DE 6.50 usec  
TE 0 K  
D1 1.00000000 sec  
D11 1  
SFO1 400.2024712 MHz  
NUC1 1H  
P1 14.00 usec  
PLW1 13.00000000 W

F2 - Processing parameters  
SI 65536  
SF 400.2000000 MHz  
WDW EM  
SSB 0  
LB 0.30 Hz  
GB 0  
PC 1.00



**Figure S5:**  $^1\text{H}$ -NMR spectrum of 4-((1H-indol-3-yl)(3-nitrophenyl)methyl)-5-methyl-2-phenyl-1,2-dihydro-3H-pyrazol-3-one (6e)

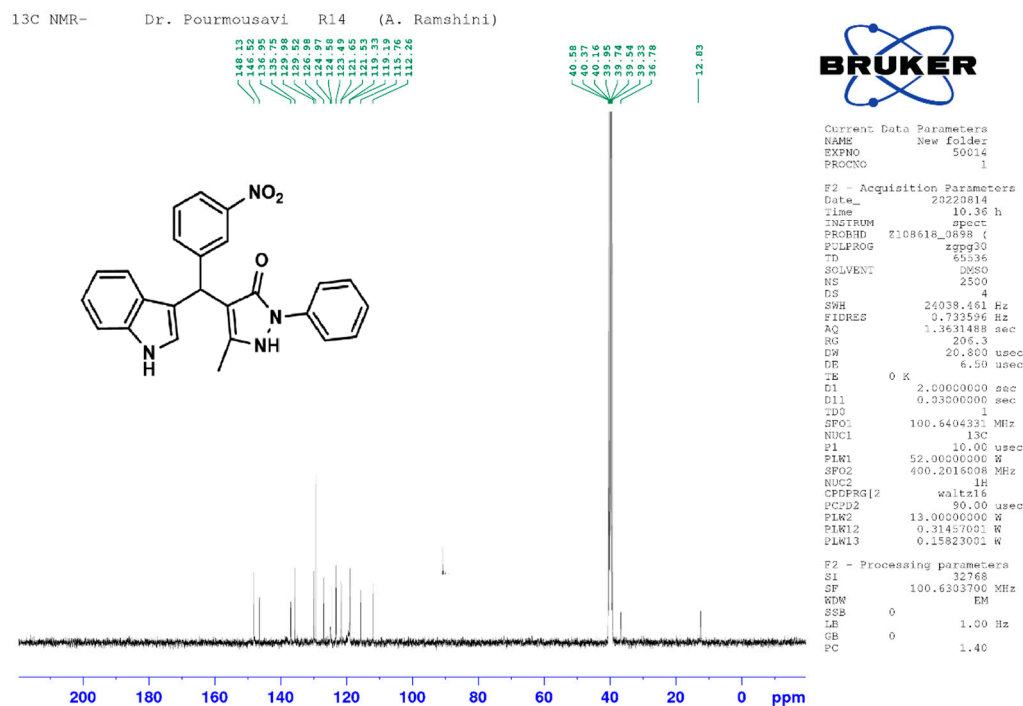

**Figure S6:**  $^{13}\text{C}$ -NMR spectrum of 4-((1H-indol-3-yl)(3-nitrophenyl)methyl)-5-methyl-2-phenyl-1,2-dihydro-3H-pyrazol-3-one (6e)

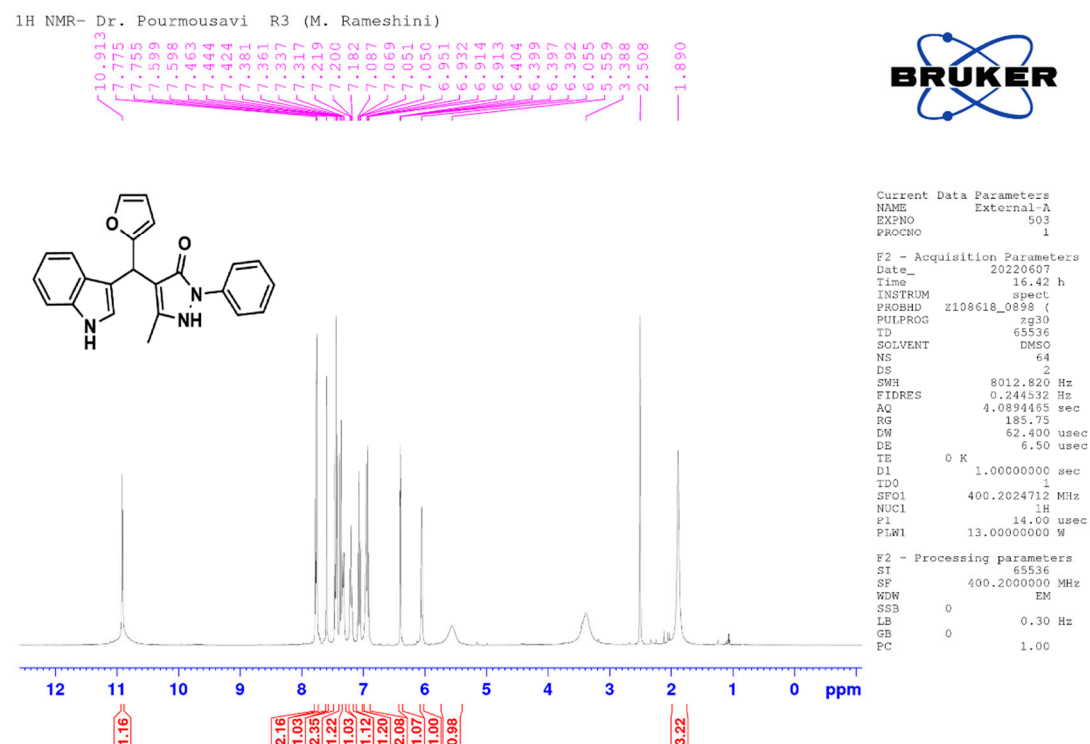

Figure S7:  $^1\text{H}$ -NMR spectrum of 4-(furan-2-yl(1H-indol-3-yl)methyl)-5-methyl-2-phenyl-1,2-dihydro-3H-pyrazol-3-one (6i)

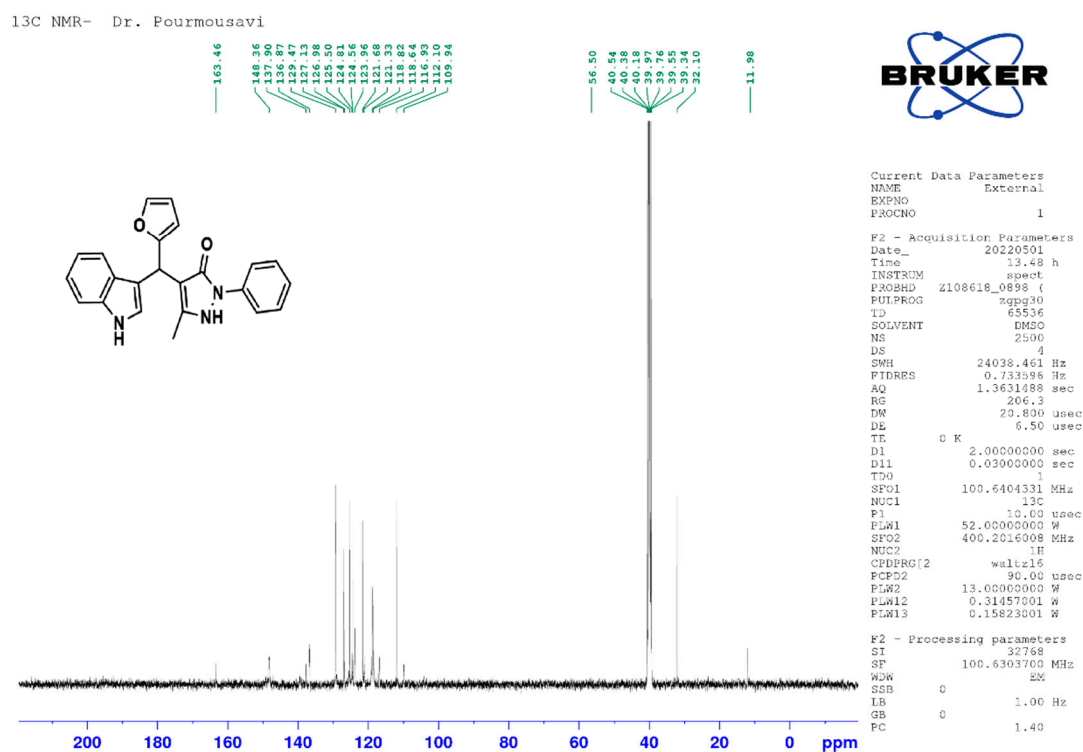

Figure S8:  $^{13}\text{C}$ -NMR spectrum of 4-(furan-2-yl(1H-indol-3-yl)methyl)-5-methyl-2-phenyl-1,2-dihydro-3H-pyrazol-3-one (6i)

<sup>1</sup>H NMR- Dr. Pourmousavi R8 (R. Rameshini)

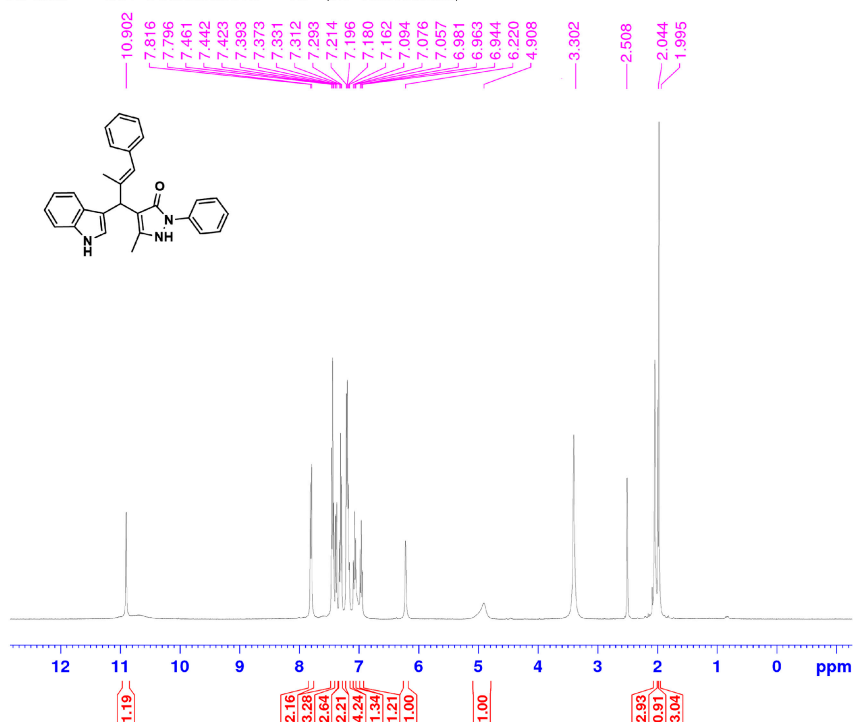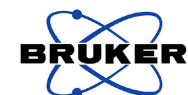

Current Data Parameters  
NAME External-A  
EXPNO 508  
PROCNO 1

F2 - Acquisition Parameters  
Date\_ 20220805  
Time 15.28 h  
INSTRUM spect  
PROBHD Z108618\_0898 (   
PULPROG zg30  
TD 65536  
SOLVENT DMSO  
NS 16  
DS 2  
SWH 8012.820 Hz  
FIDRES 0.244532 Hz  
AQ 4.0894465 sec  
RG 103.76  
DW 62.400 usec  
DE 6.50 usec  
TE 0 K  
D1 1.00000000 sec  
TD0 1  
SFO1 400.2024712 MHz  
NUC1 1H  
P1 14.00 usec  
PLW1 13.00000000 W

F2 - Processing parameters  
SI 65536  
SF 400.2000000 MHz  
WDW EM  
SSB 0  
LB 0.30 Hz  
GB 0  
PC 1.00

<sup>1</sup>H NMR- Dr. Pourmousavi R8 (R. Rameshini)

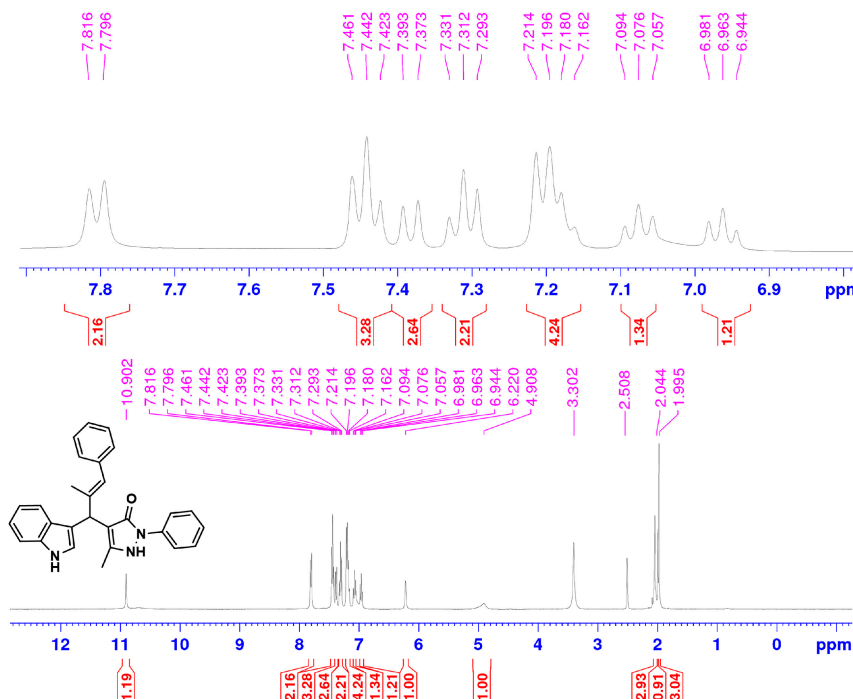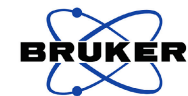

Current Data Parameters  
NAME External-A  
EXPNO 508  
PROCNO 1

F2 - Acquisition Parameters  
Date\_ 20220805  
Time 15.28 h  
INSTRUM spect  
PROBHD Z108618\_0898 (   
PULPROG zg30  
TD 65536  
SOLVENT DMSO  
NS 16  
DS 2  
SWH 8012.820 Hz  
FIDRES 0.244532 Hz  
AQ 4.0894465 sec  
RG 103.76  
DW 62.400 usec  
DE 6.50 usec  
TE 0 K  
D1 1.00000000 sec  
TD0 1  
SFO1 400.2024712 MHz  
NUC1 1H  
P1 14.00 usec  
PLW1 13.00000000 W

F2 - Processing parameters  
SI 65536  
SF 400.2000000 MHz  
WDW EM  
SSB 0  
LB 0.30 Hz  
GB 0  
PC 1.00

Figure S9: <sup>1</sup>H-NMR spectrum of 4-(1-(1H-indol-3-yl)-2-methyl-3-phenylallyl)-5-methyl-2-phenyl-1,2-dihydro-3H-pyrazol-3-one(6l)

<sup>13</sup>C NMR- Dr. Pourmousavi (A. Ramshini)

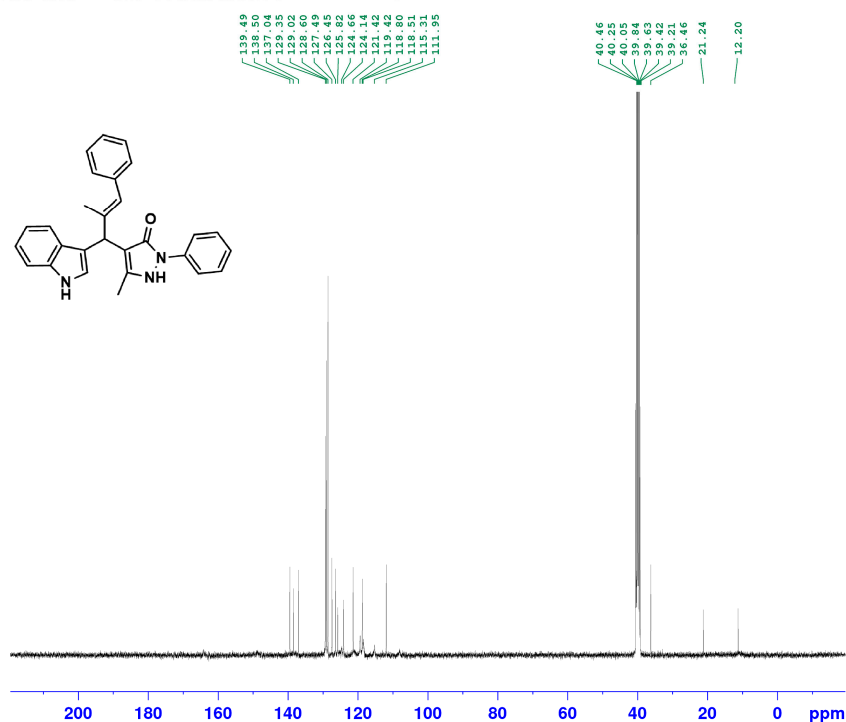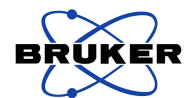

Current Data Parameters  
NAME New folder  
EXPNO 5008  
PROCNO 1

F2 - Acquisition Parameters  
Date\_ 20220813  
Time 10.22 h  
INSTRUM spect  
PROBHD Z108618\_0898 (1  
PULPROG zgpg30  
TD 65536  
SOLVENT DMSO  
NS 1350  
DS 4  
SWH 24038.461 Hz  
FIDRES 0.733596 Hz  
AQ 1.3631488 sec  
RG 206.3  
DW 20.800 usec  
DE 6.50 usec  
TE 0 K  
D1 2.00000000 sec  
D11 0.03000000 sec  
TD0 1  
SFO1 100.6404331 MHz  
NUC1 13C  
P1 10.00 usec  
PLW1 52.00000000 W  
SFO2 400.2016008 MHz  
NUC2 1H  
CPDPRG12 waltz16  
PCPD2 90.00 usec  
PLW2 13.00000000 W  
PLW12 0.31457001 W  
PLW13 0.15823001 W

F2 - Processing parameters  
SI 32768  
SF 100.6303700 MHz  
WDW EM  
SSB 0  
LB 1.00 Hz  
GB 0  
PC 1.40

**Figure S10:** <sup>13</sup>C-NMR spectrum of 4-(1-(1H-indol-3-yl)-2-methyl-3-phenylallyl)-5-methyl-2-phenyl-1,2-dihydro-3H-pyrazol-3-one(6l)

<sup>1</sup>H NMR- Dr. Pourmousavi R15 (R. Rameshini)

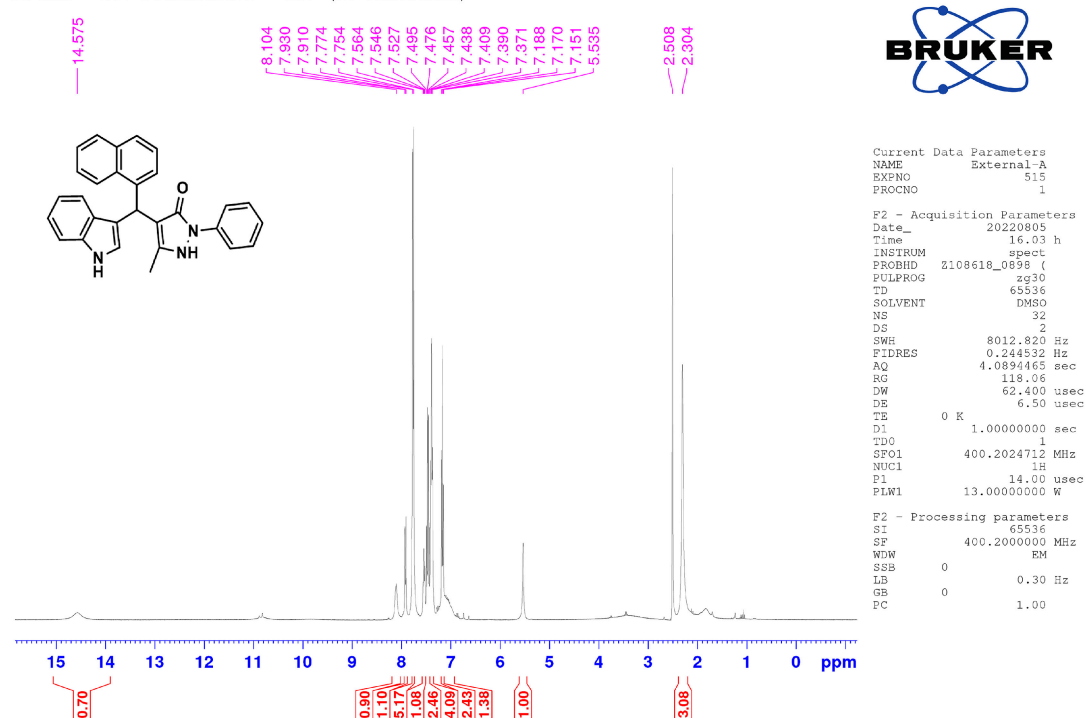

<sup>1</sup>H NMR- Dr. Pourmousavi R15 (R. Rameshini)

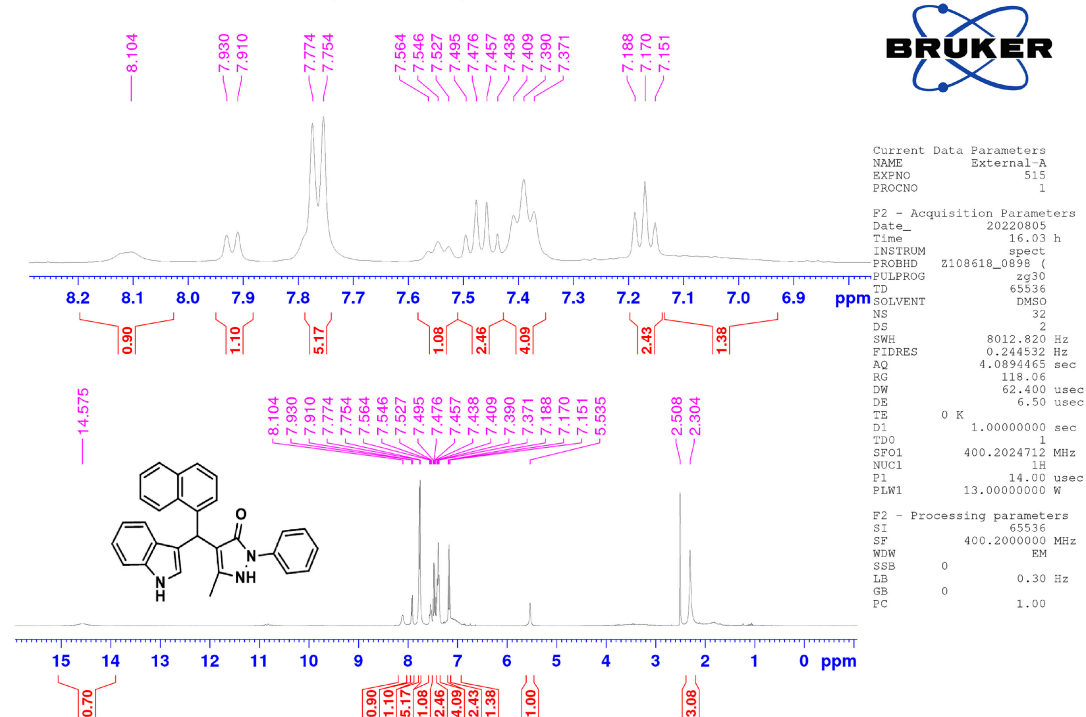

Figure S11: <sup>1</sup>H-NMR spectrum of 4-((1H-indol-3-yl)(naphthalen-1-yl)methyl)-5-methyl-2-phenyl-1,2-dihydro-3H-pyrazol-3-one (6m)

<sup>13</sup>C NMR- Dr. Pourmousavi R15 (A. Ramshini)

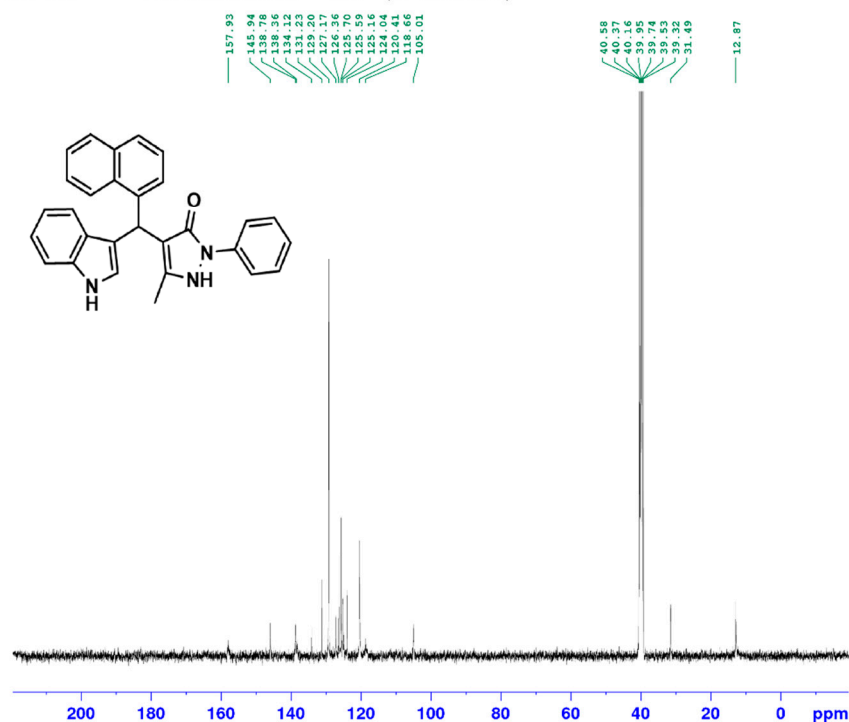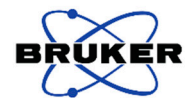

Current Data Parameters  
NAME New folder  
EXPNO 50015  
PROCNO 1

F2 - Acquisition Parameters  
Date\_ 20220827  
Time 13.35 h  
INSTRUM spect  
PROBHD Z108618\_0898 (1  
PULPROG zgpg30  
TD 65536  
SOLVENT DMSO  
NS 4096  
DS 4  
SWH 24038.461 Hz  
FIDRES 0.733596 Hz  
AQ 1.3631488 sec  
RG 205.3  
DW 20.800 usec  
DE 6.50 usec  
TE 0 K  
D1 2.00000000 sec  
D11 0.03000000 sec  
TD0 1  
SFO1 100.6404331 MHz  
NUC1 13C  
P1 10.00 usec  
PLM1 52.00000000 W  
SFO2 400.2016008 MHz  
NUC2 1H  
CPDPRG12 waltz16  
PCPD2 90.00 usec  
PLW2 13.00000000 W  
PLW12 0.31457001 W  
PLW13 0.15823001 W

F2 - Processing parameters  
SI 32768  
SF 100.6303700 MHz  
WDW EM  
SSB 0  
LB 1.00 Hz  
GB 0  
PC 1.40

**Figure S12:** <sup>13</sup>C-NMR spectrum of 4-((1H-indol-3-yl)(naphthalen-1-yl)methyl)-5-methyl-2-phenyl-1,2-dihydro-3H-pyrazol-3-one (6m)

<sup>1</sup>H NMR- Dr. Pourmousavi R17 (R. Rameshini)

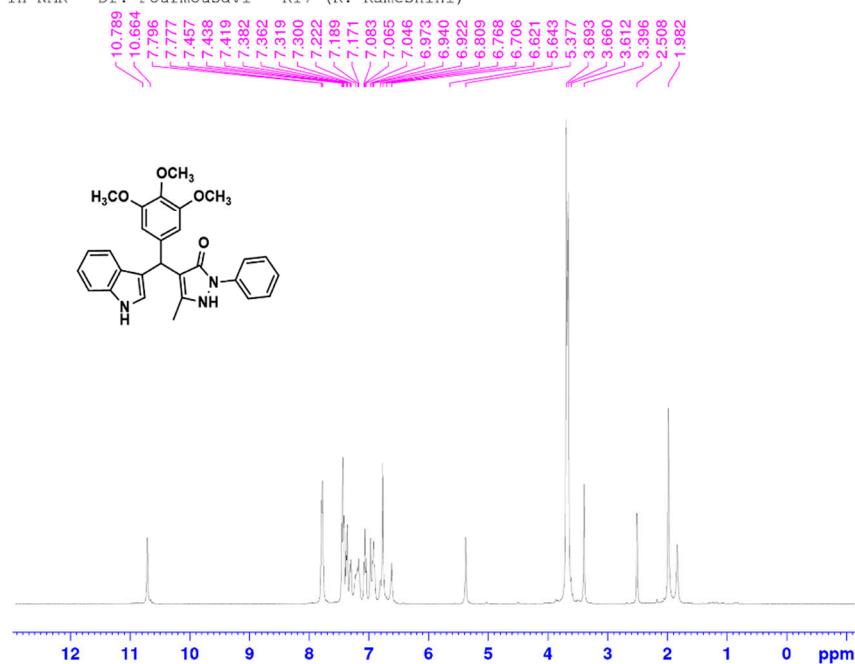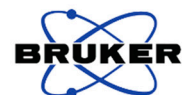

Current Data Parameters  
NAME External-A  
EXPNO 517  
PROCNO 1

F2 - Acquisition Parameters  
Date\_ 20220805  
Time 16.16 h  
INSTRUM spect  
PROBHD Z108618\_0898 (zg30)  
PULPROG zg30  
TD 65536  
SOLVENT DMSO  
NS 32  
DS 2  
SWH 8012.820 Hz  
FIDRES 0.244532 Hz  
AQ 4.0894465 sec  
RG 93.36  
DW 62.400 usec  
DE 6.50 usec  
TE 0 K  
D1 1.00000000 sec  
TDO 1  
SFO1 400.2024712 MHz  
NUC1 1H  
P1 14.00 usec  
PLW1 13.00000000 W

F2 - Processing parameters  
SI 65536  
SF 400.2000000 MHz  
WDW EM  
SSB 0  
LB 0.30 Hz  
GB 0  
PC 1.00

<sup>1</sup>H NMR- Dr. Pourmousavi R17 (R. Rameshini)

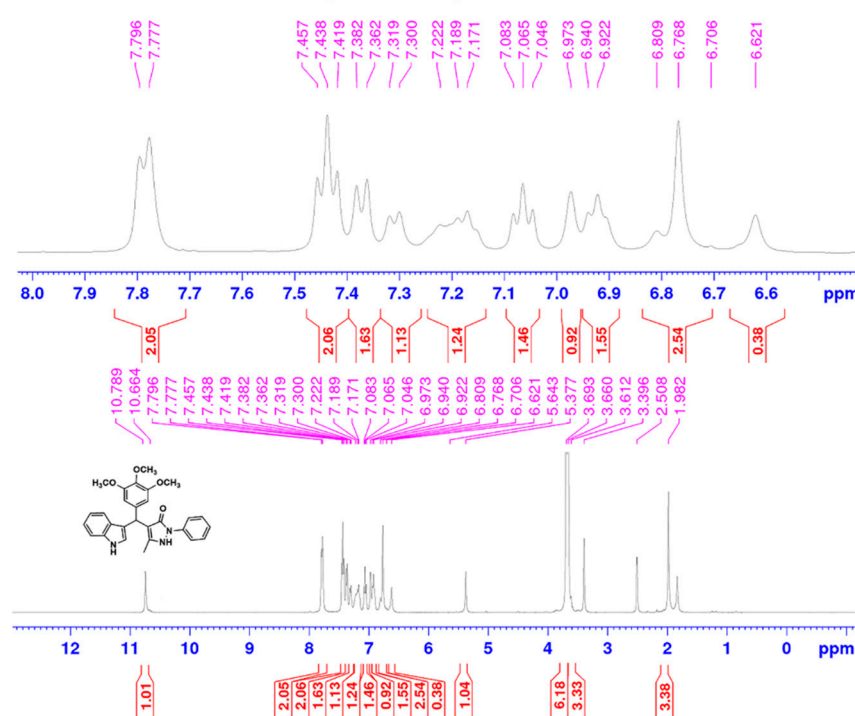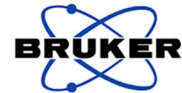

Current Data Parameters  
NAME External-A  
EXPNO 517  
PROCNO 1

F2 - Acquisition Parameters  
Date\_ 20220805  
Time 16.16 h  
INSTRUM spect  
PROBHD Z108618\_0898 (zg30)  
PULPROG zg30  
TD 65536  
SOLVENT DMSO  
NS 32  
DS 2  
SWH 8012.820 Hz  
FIDRES 0.244532 Hz  
AQ 4.0894465 sec  
RG 93.36  
DW 62.400 usec  
DE 6.50 usec  
TE 0 K  
D1 1.00000000 sec  
TDO 1  
SFO1 400.2024712 MHz  
NUC1 1H  
P1 14.00 usec  
PLW1 13.00000000 W

F2 - Processing parameters  
SI 65536  
SF 400.2000000 MHz  
WDW EM  
SSB 0  
LB 0.30 Hz  
GB 0  
PC 1.00

**Figure S13:** <sup>1</sup>H-NMR spectrum of 4-((1H-indol-3-yl)(3,4,5-trimethoxyphenyl)methyl)-5-methyl-2-phenyl-1,2-dihydro-3H-pyrazol-3-one(6n)

<sup>1</sup>H NMR- Dr. Pourmousavi R11 (R. Rameshini)

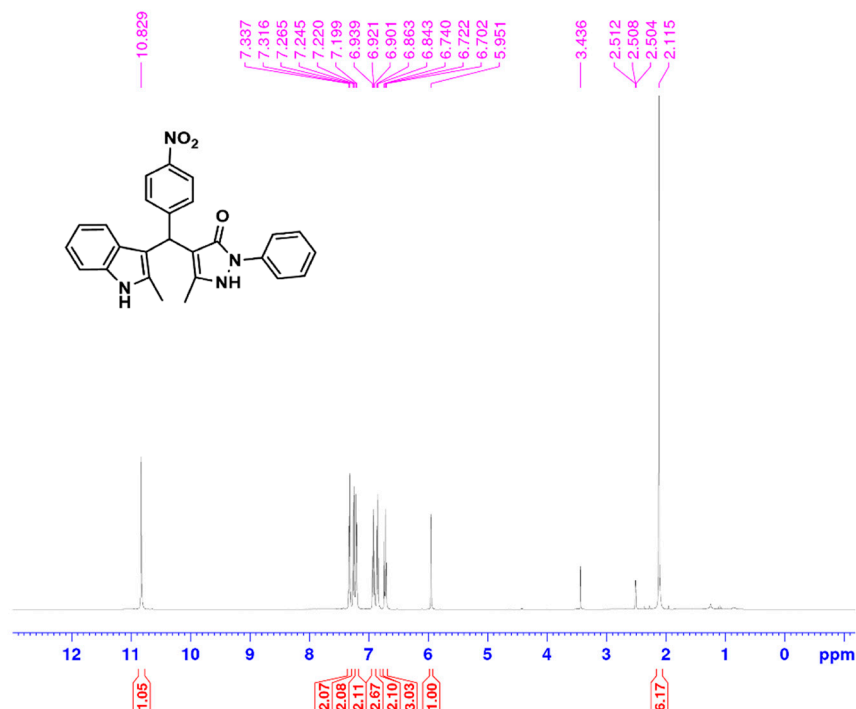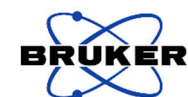

Current Data Parameters  
NAME External-A  
EXPNO 511  
PROCNO 1

F2 - Acquisition Parameters  
Date\_ 20220805  
Time 15.43 h  
INSTRUM spect  
PROBHD Z108618\_0898 (   
PULPROG zg30  
TD 65536  
SOLVENT DMSO  
NS 18  
DS 2  
SWH 8012.820 Hz  
FIDRES 0.244532 Hz  
AQ 4.0894465 sec  
RG 63.53  
DW 62.400 usec  
DE 6.50 usec  
TE 300 K  
D1 1.00000000 sec  
TDO 1  
SFO1 400.2024712 MHz  
NUC1 1H  
P1 14.00 usec  
PLW1 13.00000000 W

F2 - Processing parameters  
SI 65536  
SF 400.2000000 MHz  
WDW EM  
SSB 0  
LB 0.30 Hz  
GB 0  
PC 1.00

<sup>1</sup>H NMR- Dr. Pourmousavi R11 (R. Rameshini)

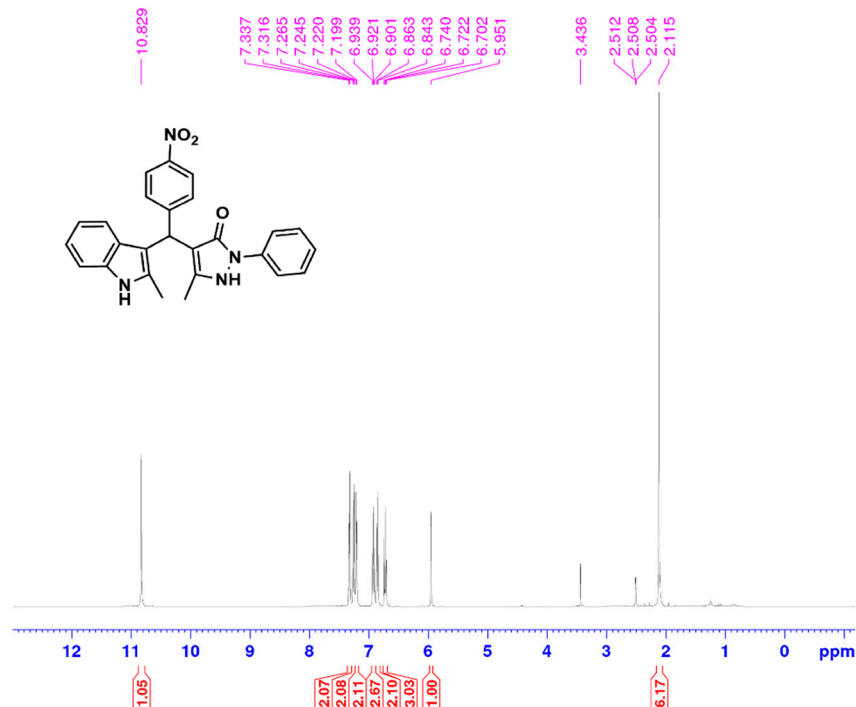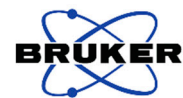

Current Data Parameters  
NAME External-A  
EXPNO 511  
PROCNO 1

F2 - Acquisition Parameters  
Date\_ 20220805  
Time 15.43 h  
INSTRUM spect  
PROBHD Z108618\_0898 (   
PULPROG zg30  
TD 65536  
SOLVENT DMSO  
NS 18  
DS 2  
SWH 8012.820 Hz  
FIDRES 0.244532 Hz  
AQ 4.0894465 sec  
RG 63.53  
DW 62.400 usec  
DE 6.50 usec  
TE 300 K  
D1 1.00000000 sec  
TDO 1  
SFO1 400.2024712 MHz  
NUC1 1H  
P1 14.00 usec  
PLW1 13.00000000 W

F2 - Processing parameters  
SI 65536  
SF 400.2000000 MHz  
WDW EM  
SSB 0  
LB 0.30 Hz  
GB 0  
PC 1.00

**Figure S14:** <sup>1</sup>H-NMR spectrum of 5-methyl-4-((2-methyl-1H-indol-3-yl)(4-nitrophenyl)methyl)-2-phenyl-1,2-dihydro-3H-pyrazol-3-one(6q)



<sup>13</sup>C NMR- Dr. Pourmousavi (A. Ramshini)

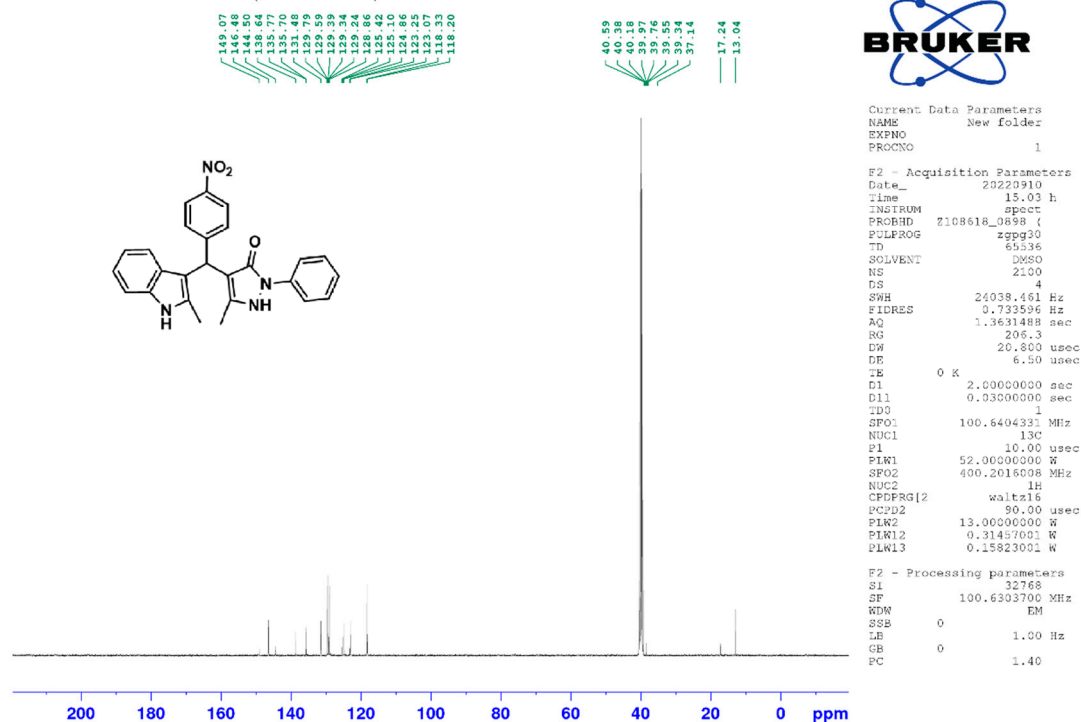

**Figure S15:** <sup>13</sup>C-NMR spectrum of 5-methyl-4-((2-methyl-1H-indol-3-yl)(4-nitrophenyl)methyl)-2-phenyl-1,2-dihydro-3H-pyrazol-3-one(6q)

<sup>1</sup>H NMR- Dr. Pourmousavi R6 (M. Rameshini)

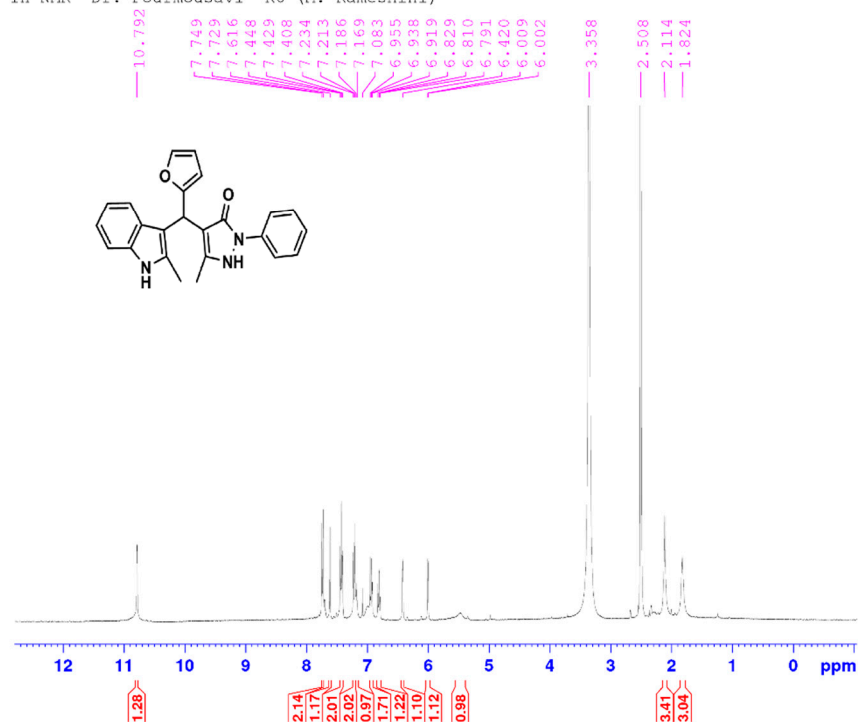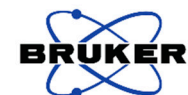

Current Data Parameters  
NAME External-A  
EXPNO 506  
PROCNO 1

F2 - Acquisition Parameters  
Date\_ 20220608  
Time 14.42 h  
INSTRUM spect  
PROBHD Z108618\_0898 (Zg30)  
PULPROG zg30  
TD 65536  
SOLVENT DMSO  
NS 64  
DS 2  
SWH 8012.820 Hz  
FIDRES 0.244532 Hz  
AQ 4.0894465 sec  
RG 206.3  
DW 62.400 usec  
DE 6.50 usec  
TE 0 K  
D1 1.00000000 sec  
TD0 1  
SFO1 400.2024712 MHz  
NUC1 1H  
P1 14.00 usec  
PLW1 13.00000000 W

F2 - Processing parameters  
SI 65536  
SF 400.2000000 MHz  
WDW EM  
SSB 0  
LB 0.30 Hz  
GB 0  
PC 1.00

<sup>1</sup>H NMR- Dr. Pourmousavi R6 (M. Rameshini)

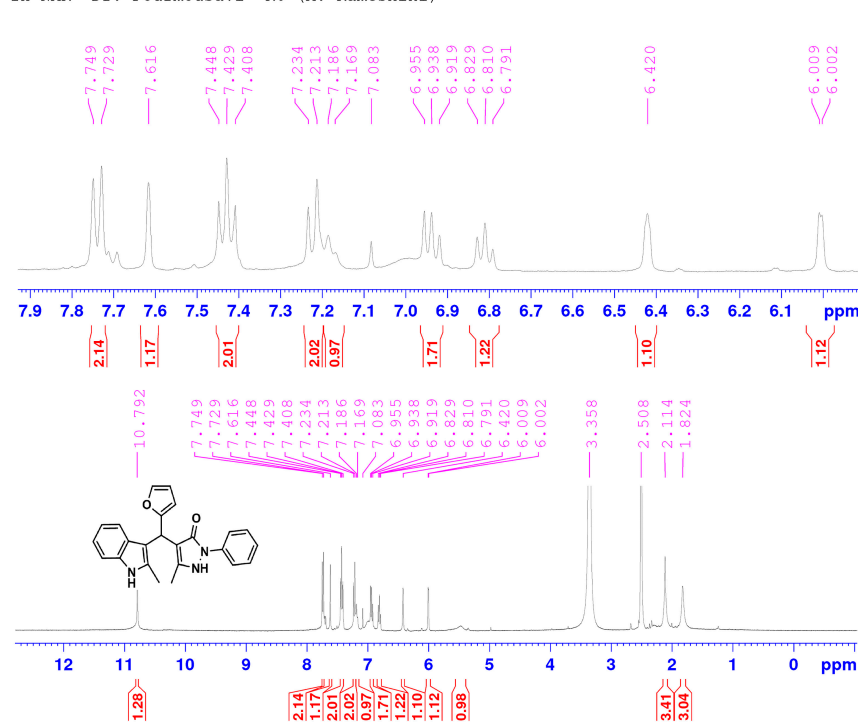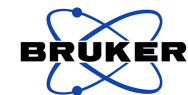

Current Data Parameters  
NAME External-A  
EXPNO 506  
PROCNO 1

F2 - Acquisition Parameters  
Date\_ 20220608  
Time 14.42 h  
INSTRUM spect  
PROBHD Z108618\_0898 (Zg30)  
PULPROG zg30  
TD 65536  
SOLVENT DMSO  
NS 64  
DS 2  
SWH 8012.820 Hz  
FIDRES 0.244532 Hz  
AQ 4.0894465 sec  
RG 206.3  
DW 62.400 usec  
DE 6.50 usec  
TE 0 K  
D1 1.00000000 sec  
TD0 1  
SFO1 400.2024712 MHz  
NUC1 1H  
P1 14.00 usec  
PLW1 13.00000000 W

F2 - Processing parameters  
SI 65536  
SF 400.2000000 MHz  
WDW EM  
SSB 0  
LB 0.30 Hz  
GB 0  
PC 1.00

**Figure S16:** <sup>1</sup>H-NMR spectrum of 4-(furan-2-yl(2-methyl-1H-indol-3-yl)methyl)-5-methyl-2-phenyl-1,2-dihydro-3H-pyrazol-3-one (6r)

<sup>13</sup>C NMR- Dr. Pourmousavi

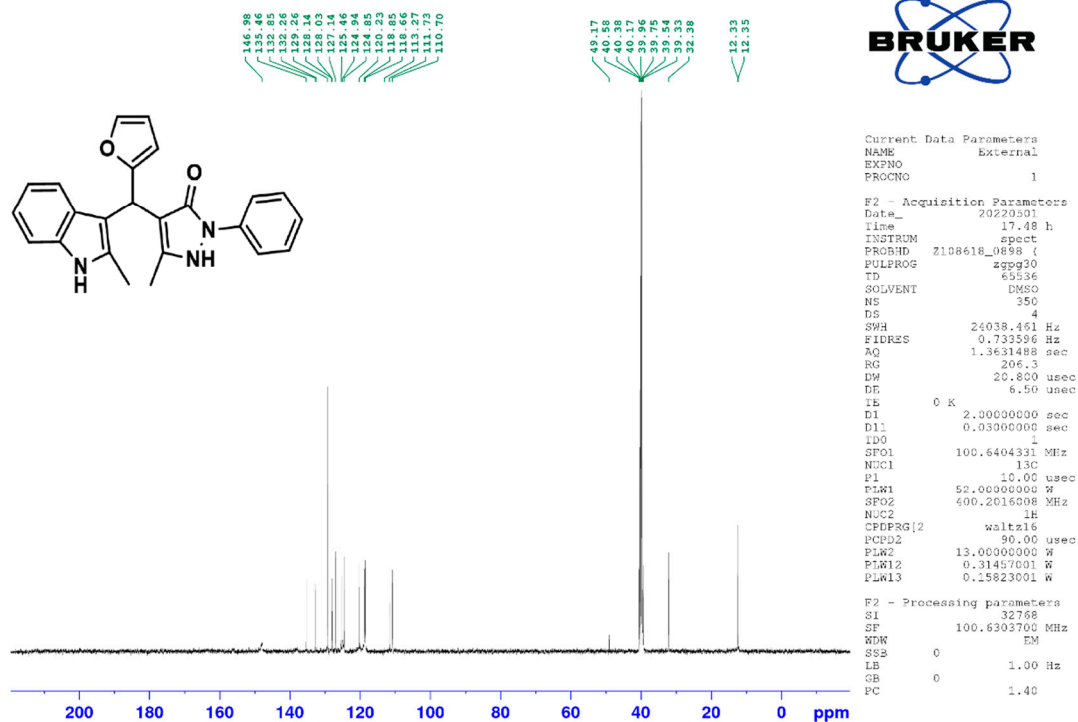

**Figure S17:** <sup>13</sup>C-NMR spectrum of 4-(furan-2-yl(2-methyl-1H-indol-3-yl)methyl)-5-methyl-2-phenyl-1,2-dihydro-3H-pyrazol-3-one(**6r**)

<sup>1</sup>H NMR- Dr. Pourmousavi R1 (M. Rameshini)

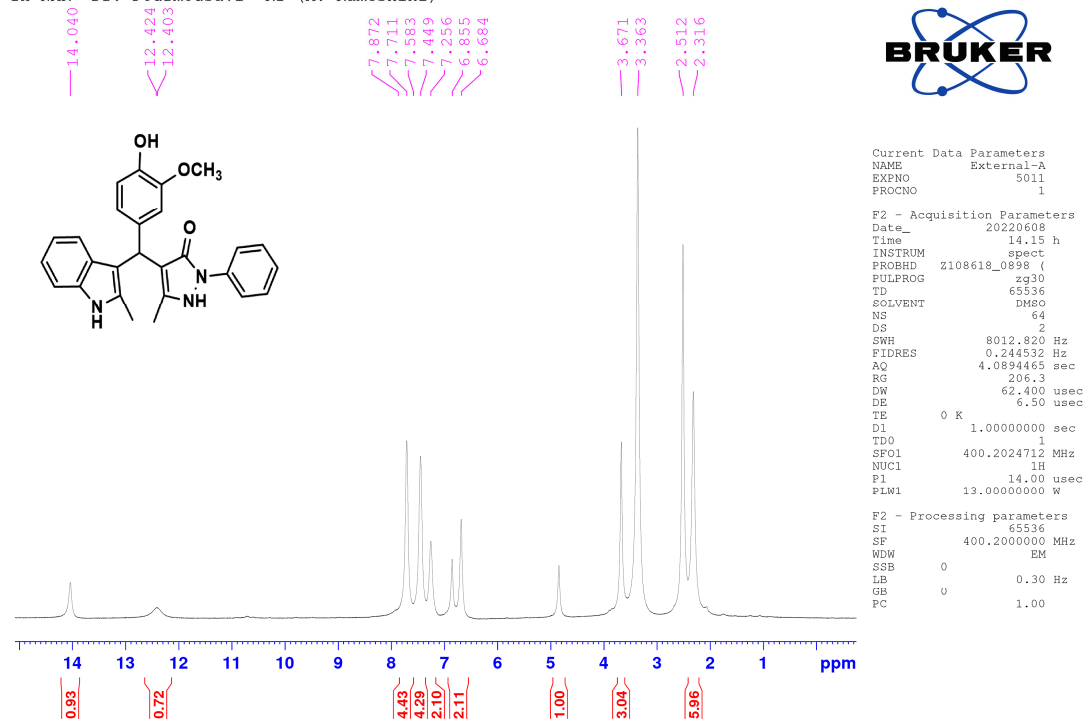

**Figure S18:** <sup>1</sup>H-NMR spectrum of 4-((4-hydroxy-3-methoxyphenyl)(2-methyl-1H-indol-3-yl)methyl)-5-methyl-2-phenyl-1,2-dihydro-3H-pyrazol-3-one(6t)

<sup>13</sup>C NMR- Dr. Pourmousavi R4 (M. Rameshini)

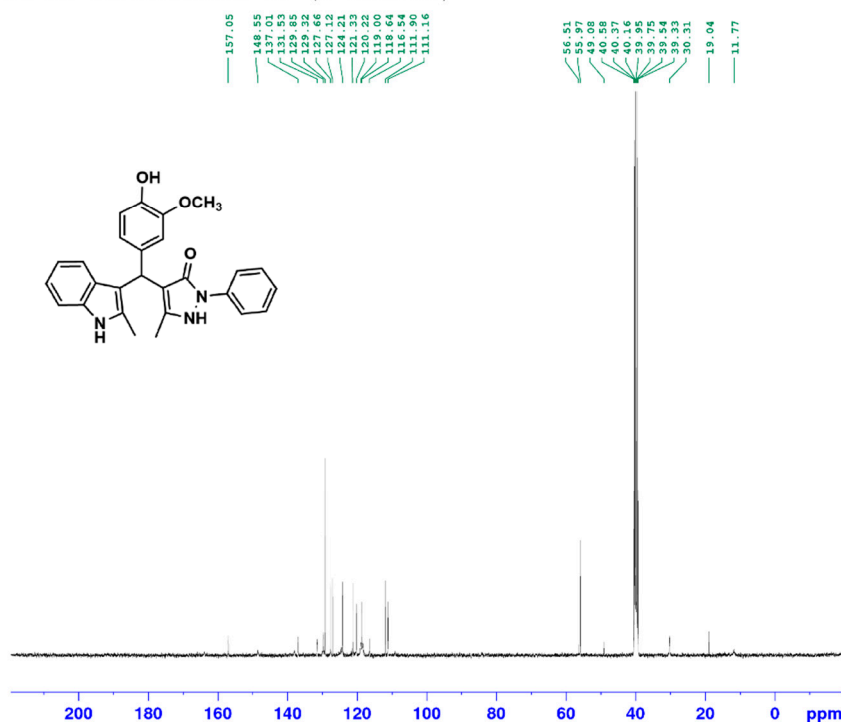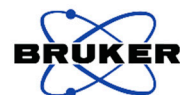

Current Data Parameters  
NAME External-A  
EXPNO 504504  
PROCNO 1

F2 - Acquisition Parameters  
Date\_ 20220608  
Time 9.33 h  
INSTRUM spect  
PROBHD Z108618\_0898 ( )  
PULPROG zgpg30  
TD 65536  
SOLVENT DMSO  
NS 1700  
DS 4  
SWH 24038.461 Hz  
FIDRES 0.733596 Hz  
AQ 1.3631488 sec  
RG 206.3  
DE 20.800 usec  
TE 0 K  
D1 2.00000000 sec  
D11 0.03000000 sec  
TDO 1  
SFO1 100.6404331 MHz  
NUC1 13C  
P1 10.00 usec  
PLW1 52.00000000 W  
SFO2 400.2016008 MHz  
NDCZ 1H  
CPDPRG2 waltz16  
PCPD2 90.00 usec  
PLW2 13.00000000 W  
PLW12 0.31457001 W  
PLW13 0.15823001 W

F2 - Processing parameters  
SI 32768  
SF 100.6303700 MHz  
WDW EM  
SSB 0  
LB 1.00 Hz  
GB 0  
PC 1.40

Figure S19: <sup>13</sup>C-NMR spectrum of 4-((4-hydroxy-3-methoxyphenyl)(2-methyl-1H-indol-3-yl)methyl)-5-methyl-2-phenyl-1,2-dihydro-3H-pyrazol-3-one(6t)

<sup>1</sup>H NMR- Dr. Pourmousavi R21 (A. Ramshini)

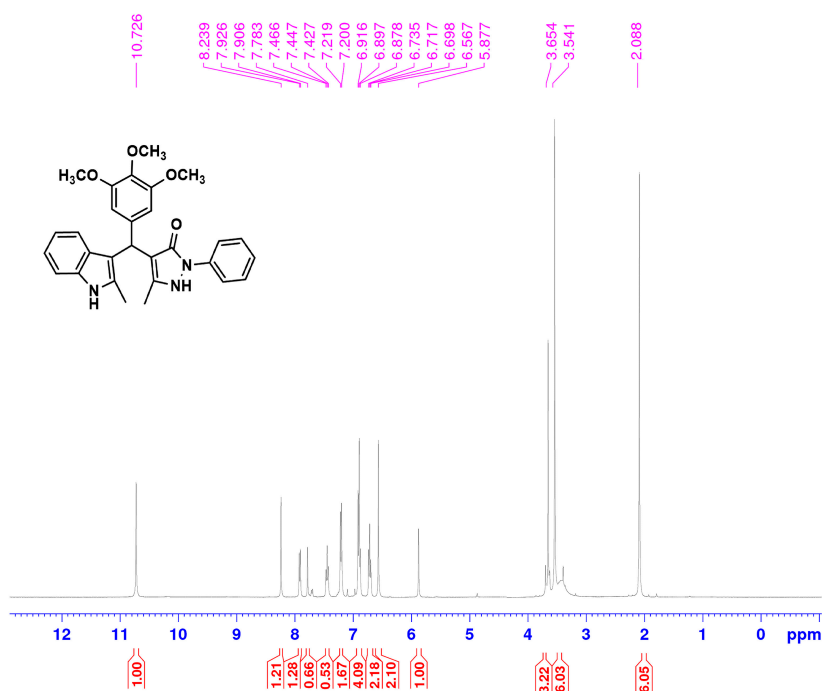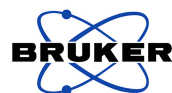

Current Data Parameters  
NAME New folder  
EXPNO 921  
PROCNO 1

F2 - Acquisition Parameters  
Date\_ 20220826  
Time 16.13 h  
INSTRUM spect  
PROBHD Z108618\_0898 ( )  
PULPROG zg30  
TD 65536  
SOLVENT DMSO  
NS 16  
DS 2  
SWH 8012.820 Hz  
FIDRES 0.244532 Hz  
AQ 4.0894465 sec  
RG 103.76  
DE 62.400 usec  
TE 0 K  
D1 1.00000000 sec  
D11 1  
SFO1 400.2024712 MHz  
NUC1 1H  
P1 14.00 usec  
PLW1 13.00000000 W

F2 - Processing parameters  
SI 65536  
SF 400.2000000 MHz  
WDW EM  
SSB 0  
LB 0.30 Hz  
GB 0  
PC 1.00

**Figure S20:**  $^1\text{H}$ -NMR spectrum of 5-methyl-4-((2-methyl-1H-indol-3-yl)(3,4,5-trimethoxyphenyl)methyl)-2-phenyl-1,2-dihydro-3H-pyrazol-3-one (**6u**)

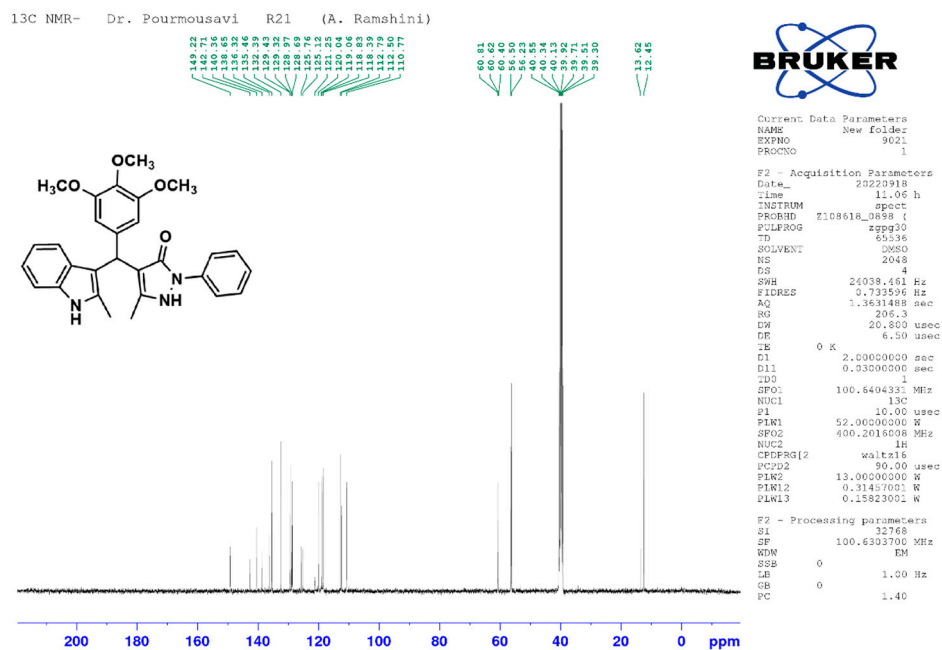

**Figure S21:**  $^{13}\text{C}$ -NMR spectrum of 5-methyl-4-((2-methyl-1H-indol-3-yl)(3,4,5-trimethoxyphenyl)methyl)-2-phenyl-1,2-dihydro-3H-pyrazol-3-one (**6u**)

<sup>1</sup>H NMR- Dr. Pourmousavi R9 (R. Rameshini)

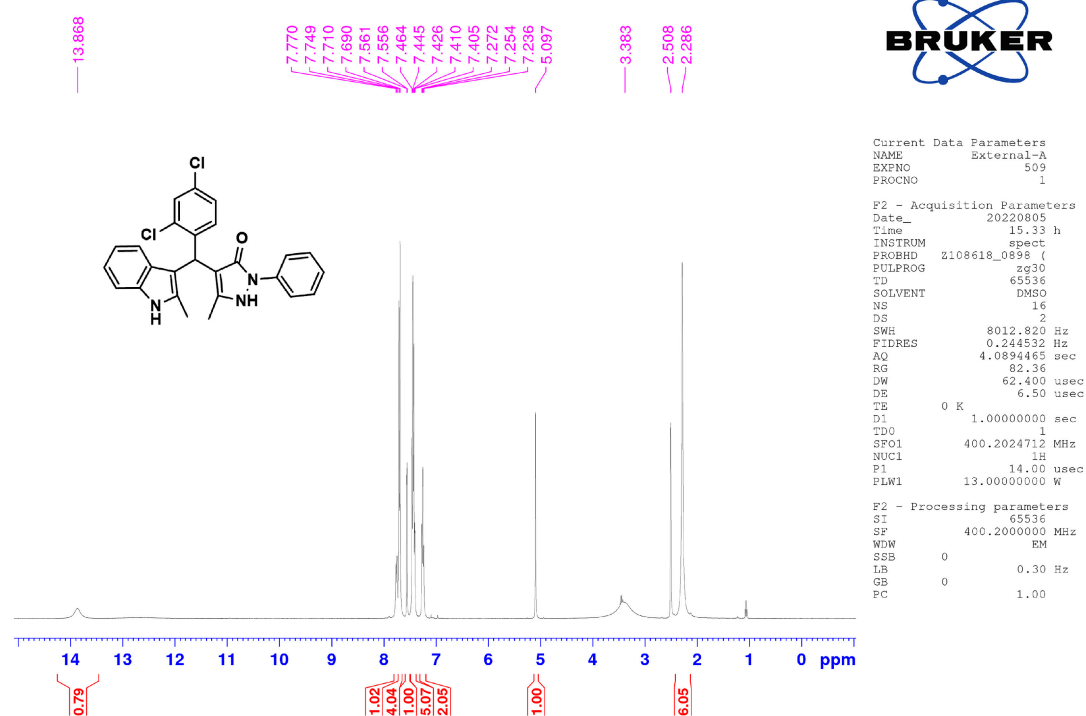

**Figure S22:** <sup>1</sup>H-NMR spectrum of 4-((2,4-dichlorophenyl)(2-methyl-1H-indol-3-yl)methyl)-5-methyl-2-phenyl-1,2-dihydro-3H-pyrazol-3-one (6v)

<sup>13</sup>C NMR- Dr. Pourmousavi R9 (A. Ramshini)

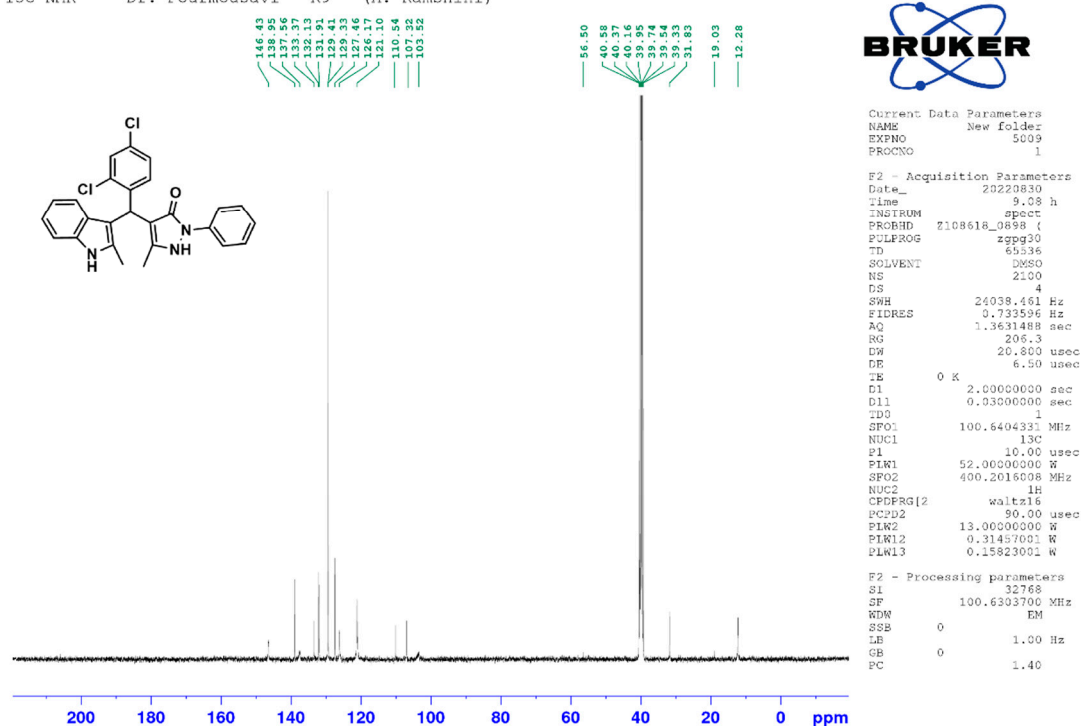

**Figure S23:** <sup>13</sup>C-NMR spectrum of 4-((2,4-dichlorophenyl)(2-methyl-1H-indol-3-yl)methyl)-5-methyl-2-phenyl-1,2-dihydro-3H-pyrazol-3-one (6v)



<sup>1</sup>H NMR- Dr. Pourmousavi R5 (M. Rameshini)

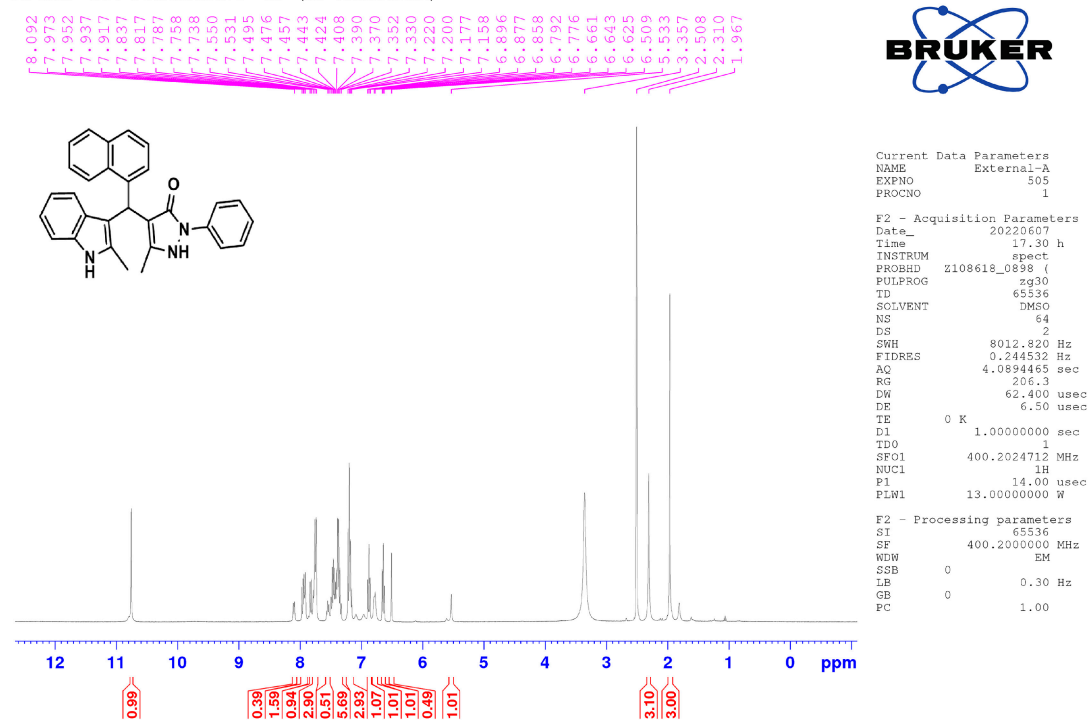

**Figure S24:** <sup>1</sup>H-NMR spectrum of 5-methyl-4-((2-methyl-1H-indol-3-yl)(naphthalen-1-yl)methyl)-2-phenyl-1,2-dihydro-3H-pyrazol-3-one(6w)

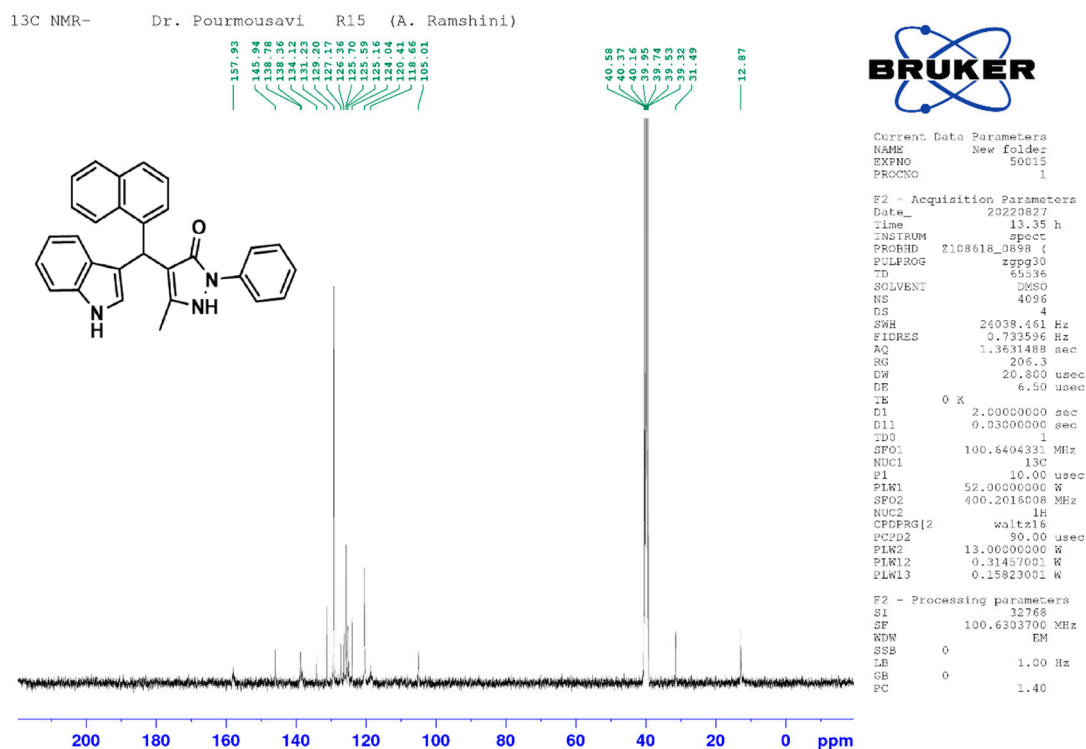

Figure S25: <sup>13</sup>C-NMR spectrum of 5-methyl-4-((2-methyl-1H-indol-3-yl)(naphthalen-1-yl)methyl)-2-phenyl-1,2-dihydro-3H-pyrazol-3-one(6w)

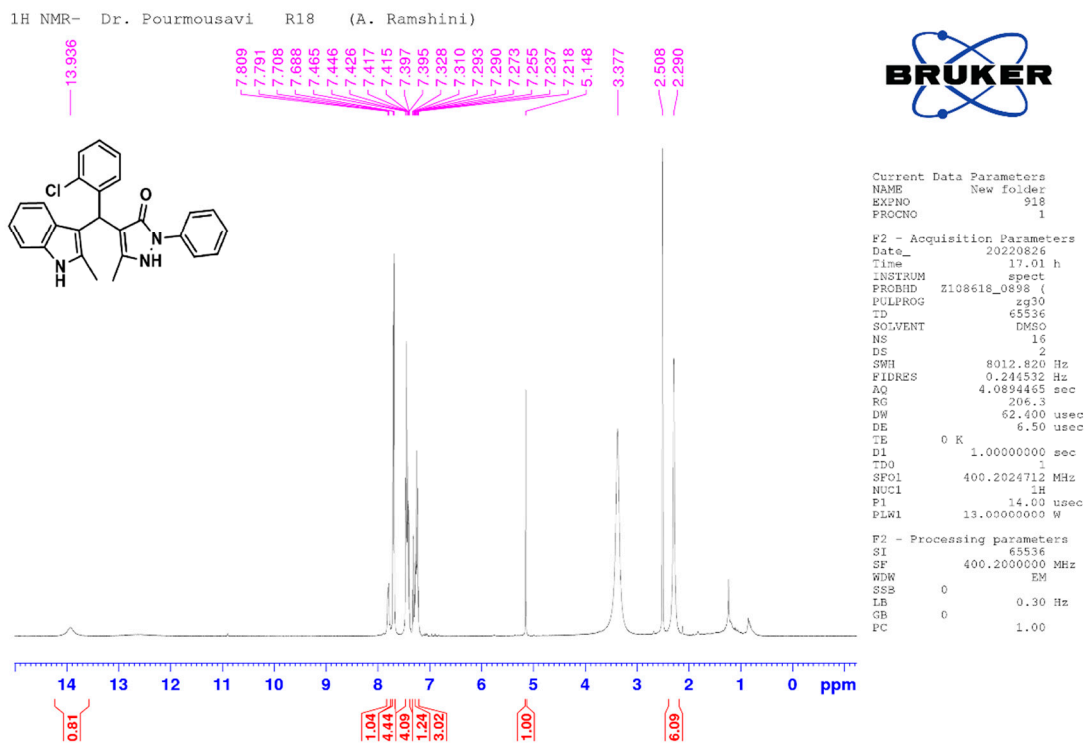

**Figure S27:**  $^{13}\text{C}$ -NMR spectrum of: 4-((2-chlorophenyl)(2-methyl-1H-indol-3-yl)methyl)-5-methyl-2-phenyl-1,2-dihydro-3H-pyrazol-3-one (**6x**)

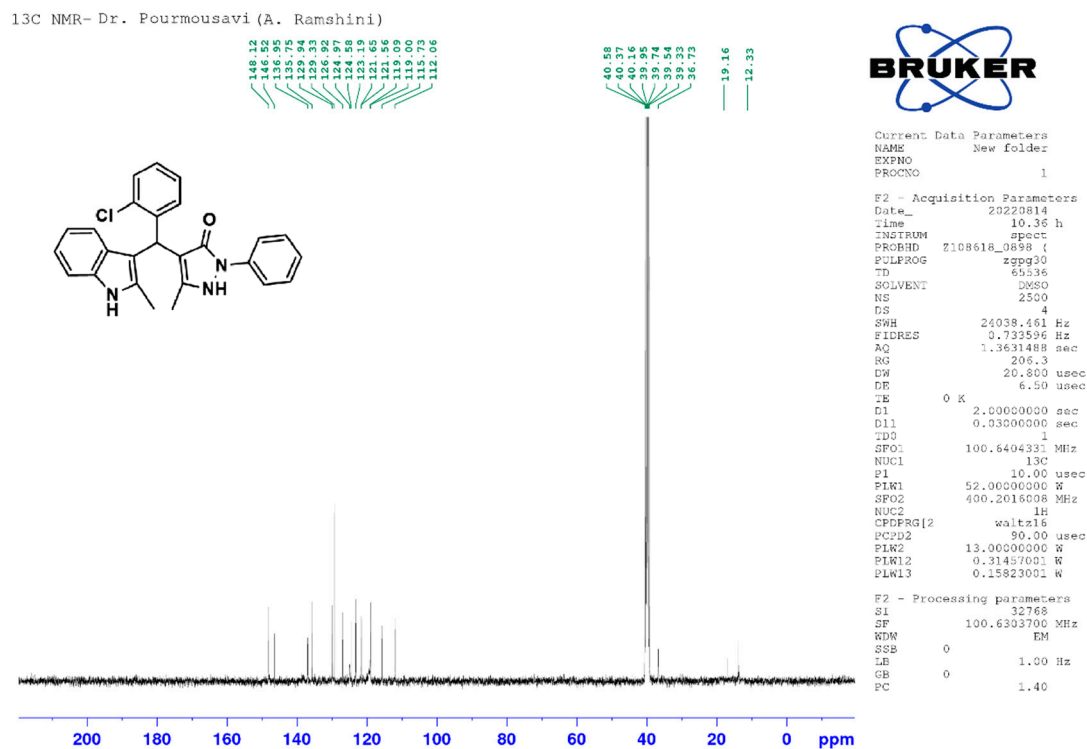

Supplement: s1 [file s1]
